# Supplementary material
Source: publisher figshare collection journal article supplement (https://acs.figshare.com/ndownloader/files/26754399)
Supplement: Supplementary file 1 [file 26754399]

## Supporting Information

### **Metal-Organic Framework-Based Flexible Devices with Simultaneous Electrochromic and Electrofluorochromic Functions**

*Jian Liu<sup>a</sup>, Xiu Yun Daphne Ma<sup>a</sup>, Zhe Wang<sup>a</sup>, Lulu Xu<sup>a</sup>, Fuke Wang<sup>b</sup>, Chaobin He<sup>b,c</sup>,  
Xuehong Lu<sup>a,\*</sup>*

<sup>a</sup> School of Materials Science and Engineering, Nanyang Technological University, 50 Nanyang Avenue, 639798, Singapore.

<sup>b</sup> Institute of Materials Research and Engineering, 2 Fusionopolis Way, 138634, Singapore.

<sup>c</sup> Department of Materials Science and Engineering, National University of Singapore, 117574, Singapore

**KEYWORDS.** Metal organic frameworks, electrodeposition, electrochromic, electrofluorochromic, flexible device

#### **Corresponding Author**

[asxhlu@ntu.edu.sg](mailto:asxhlu@ntu.edu.sg) (Xuehong Lu)

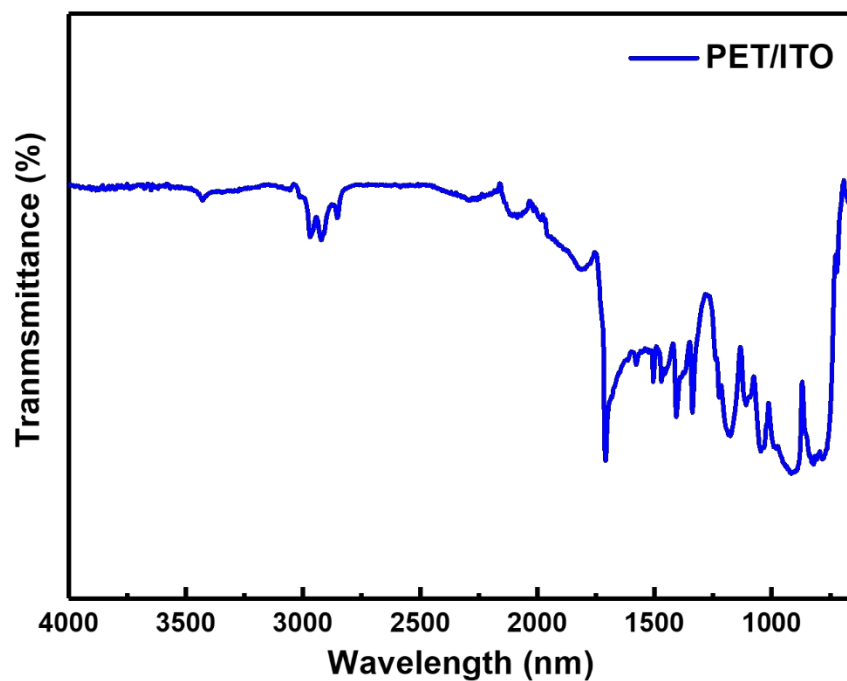

**Figure S1.** FTIR-ATR spectra of PET/ITO.

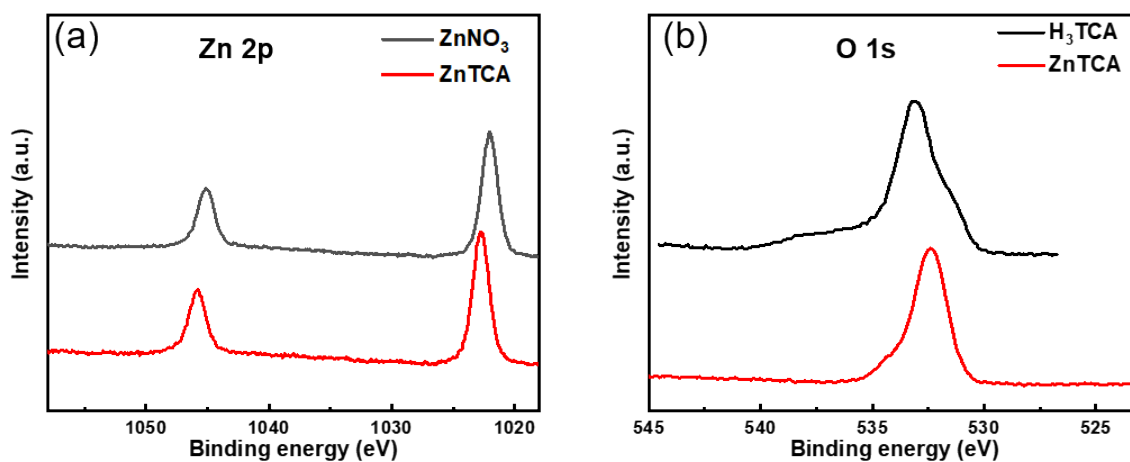

**Figure S2.** The (a) Zn 2p and (b) O 1s XPS spectrum of raw materials and ZnTCA samples.

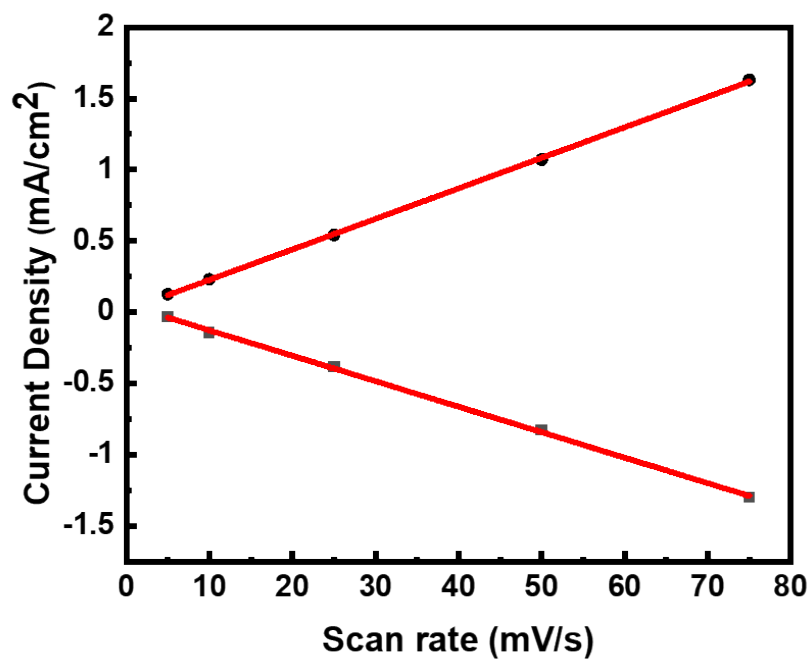

**Figure S3.** Current density vs scan rate of MOF-based film.

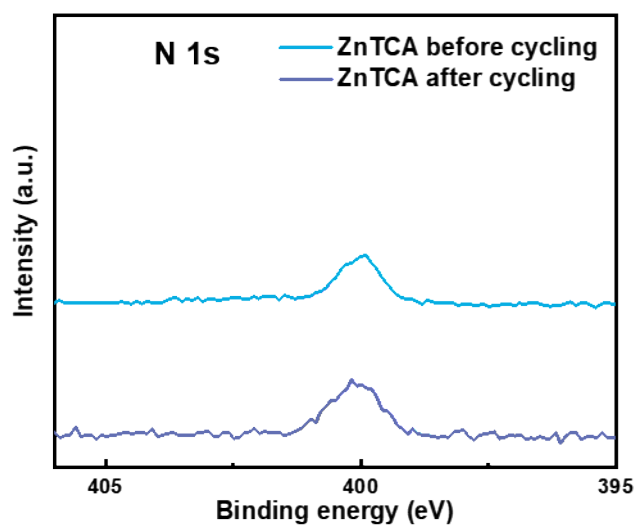

**Figure S4.** The N 1s XPS spectrum of ZnTCA samples before and after cycling.

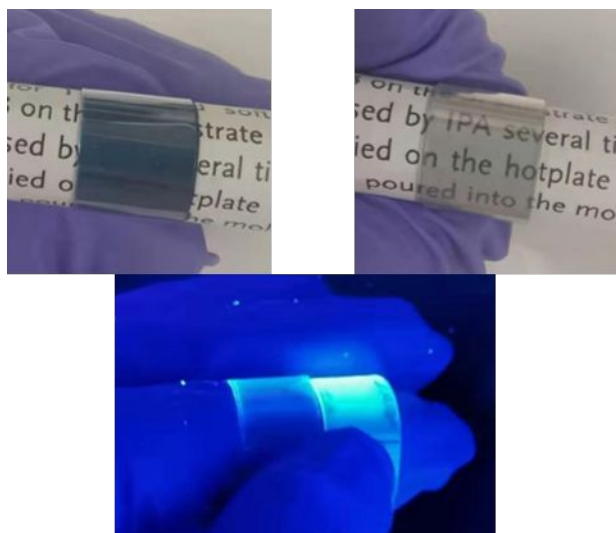

**Figure S5.** The photos of bending device under bright and dark condition under excitation of 365 nm.
